# Supplementary material for: High levels of NRF2 sensitize temozolomide-resistant glioblastoma cells to ferroptosis via ABCC1/MRP1 upregulation
Source: PubMed Central journal article supplement (PMC9270336; doi:10.1038/s41419-022-05044-9), 2022-07-08

## ORIGINAL WESTERN BLOTS

**Note:** NRS = Not related sample.

**Figure 2B:**

**NRF2:**

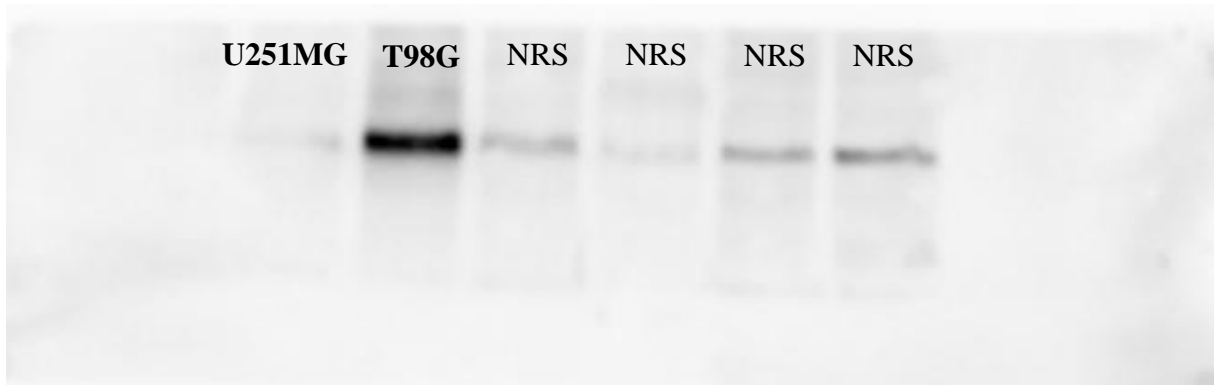

**b-actin of NRF2 membrane:**

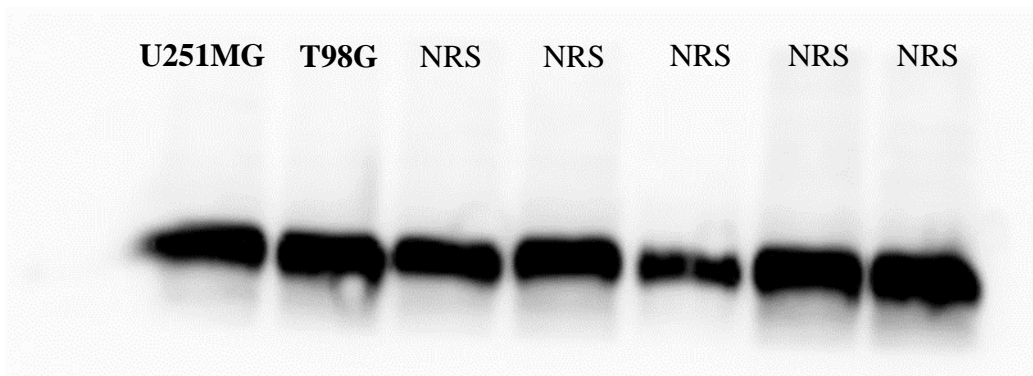

**MRP1:**

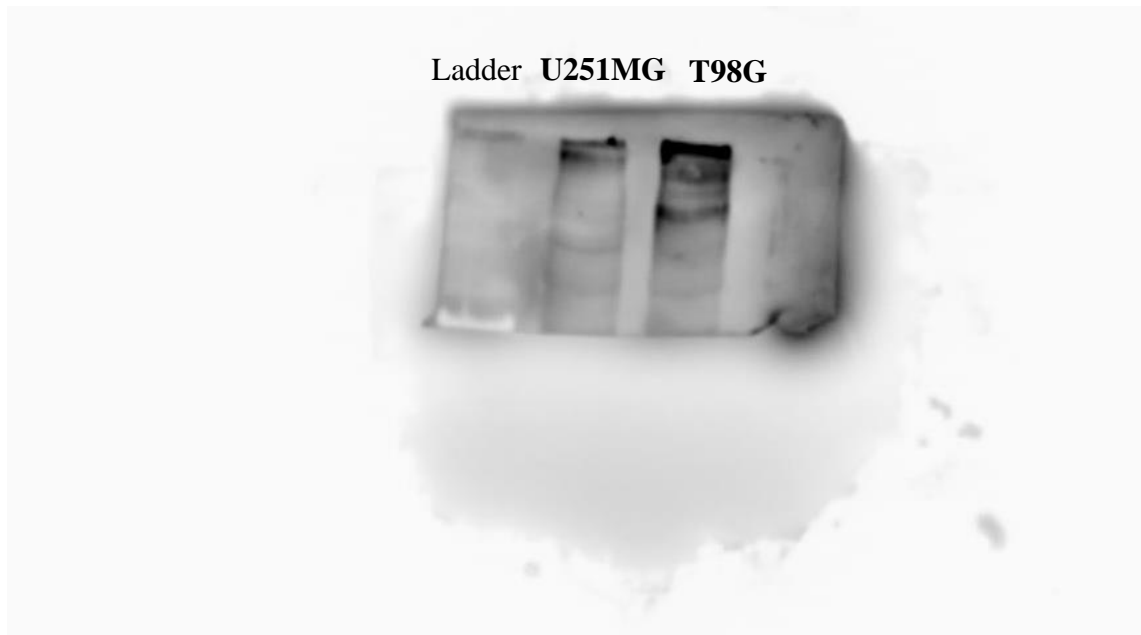

**b-actin of MRP1 membrane:**

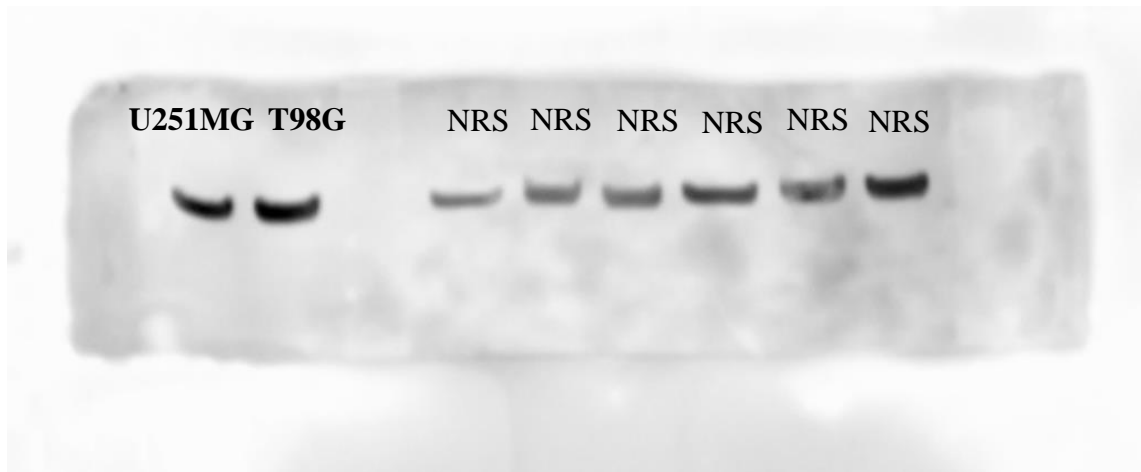

**Figure 4B:**

**NRF2:**

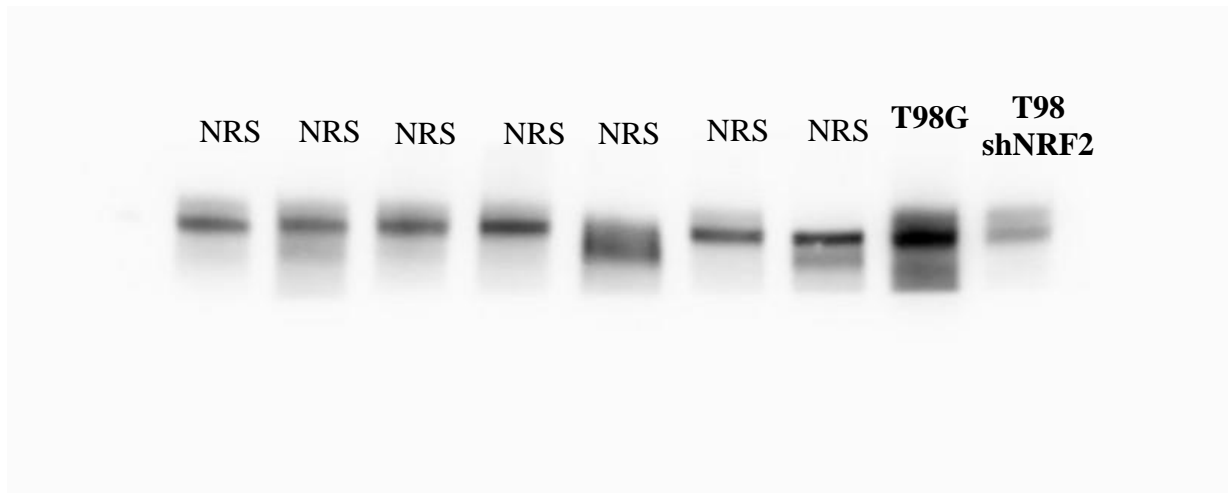

**b-actin:**

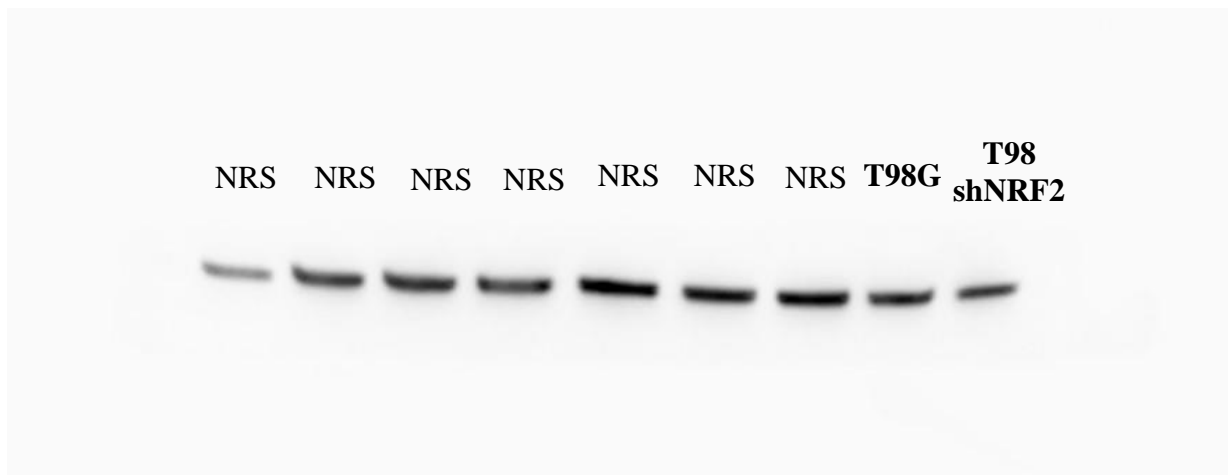

**Figure 4F:**

**MRP1:**

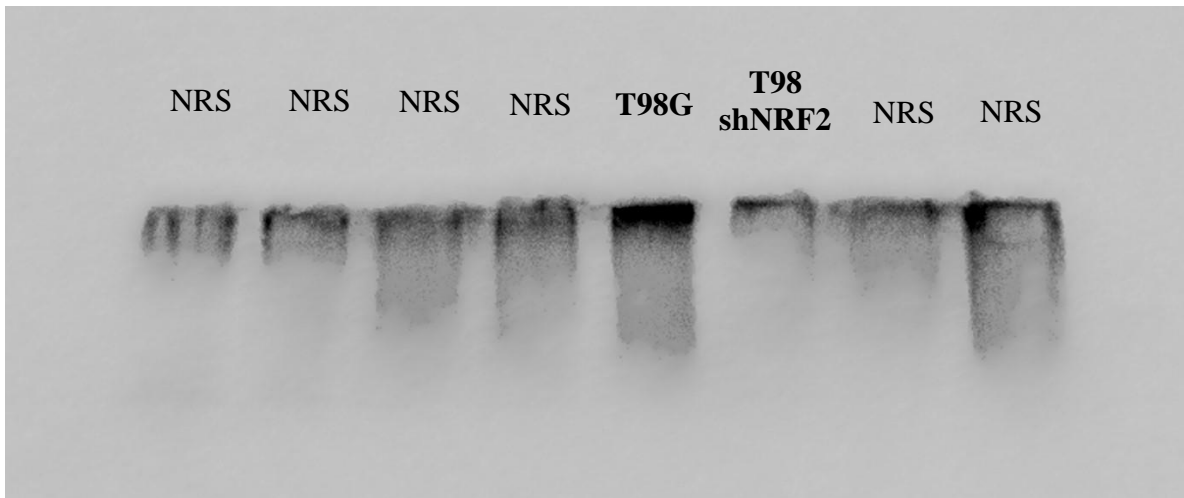

**b-actin:**

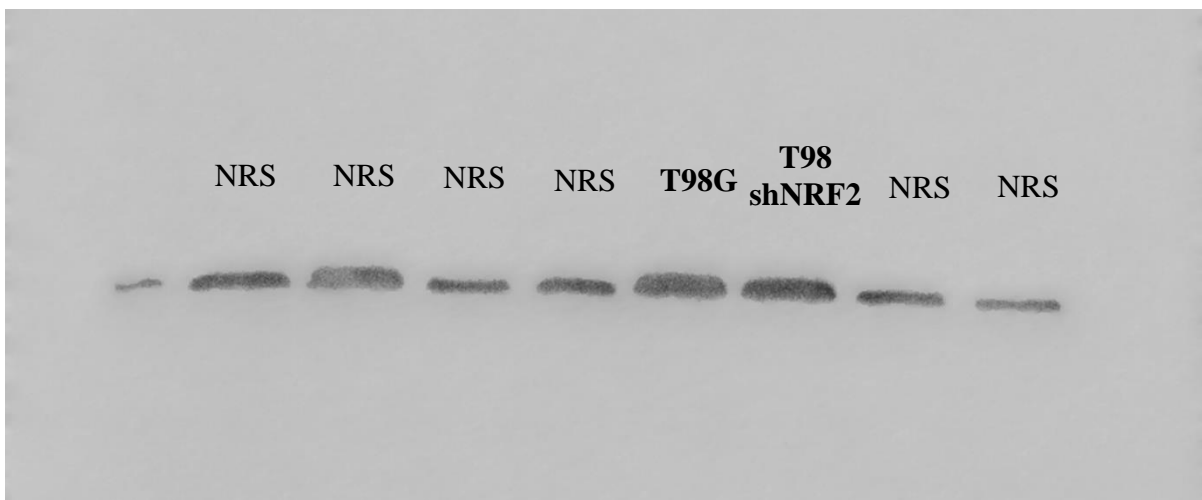

**Figure 4G:**

**MRP1:**

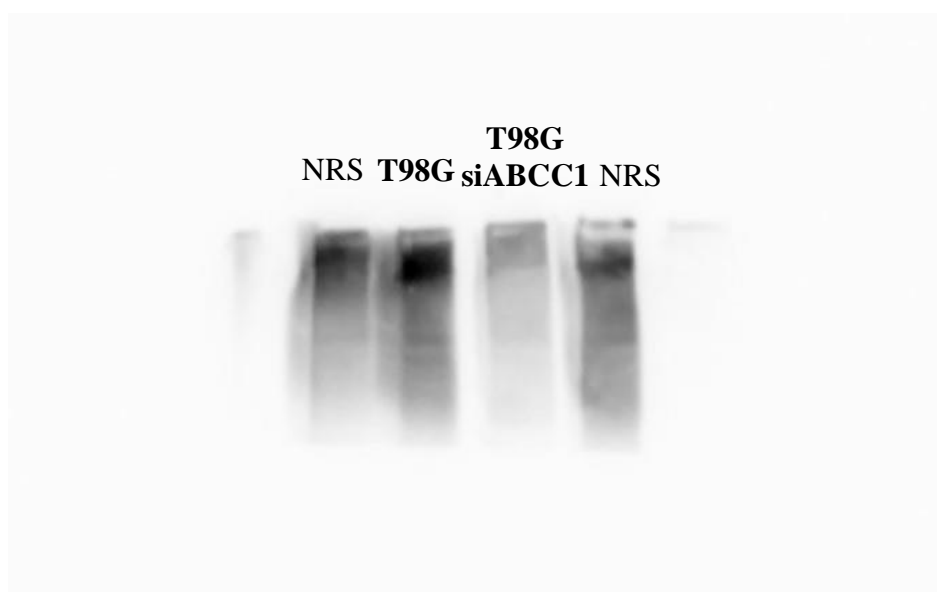

**b-actin:**

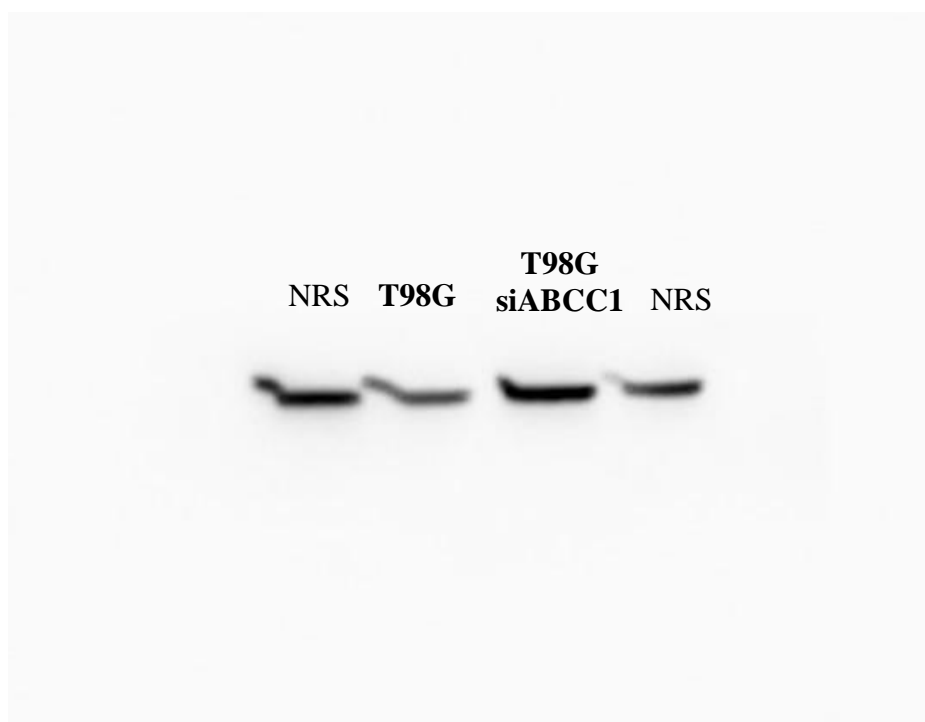

**Figure 5A:**

**NRF2:**

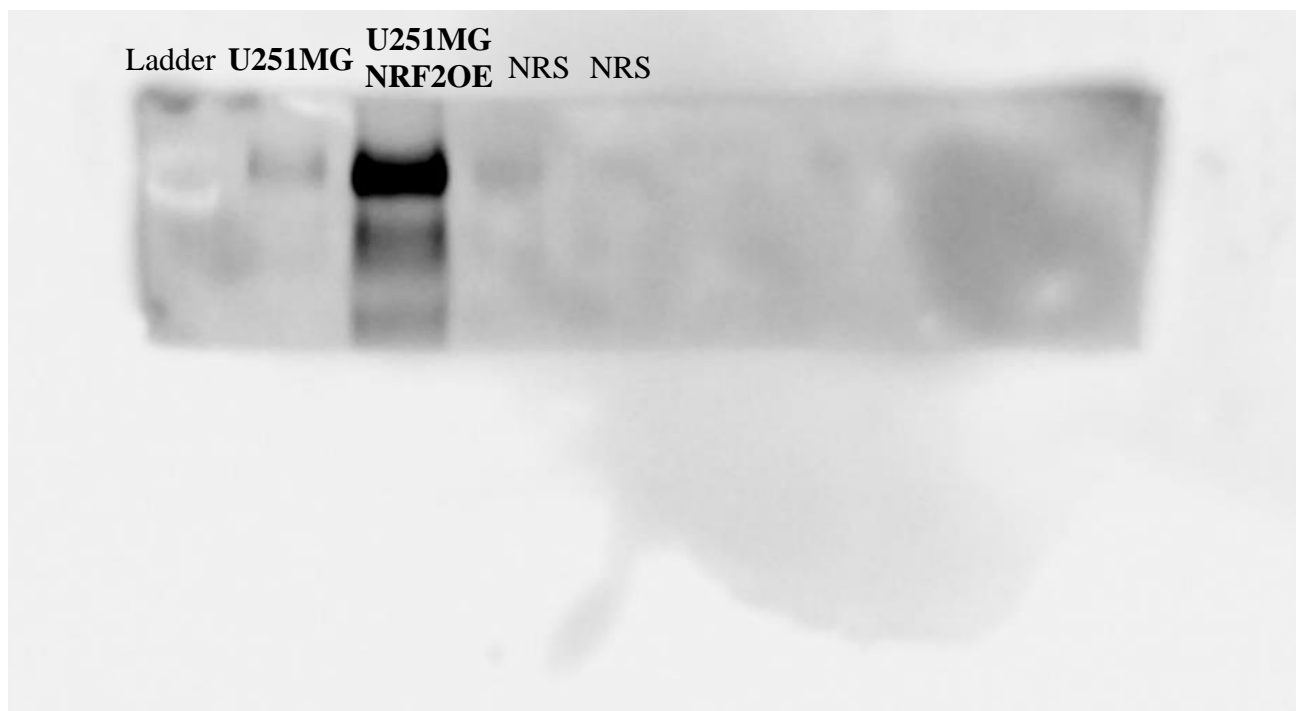

**MRP1:**

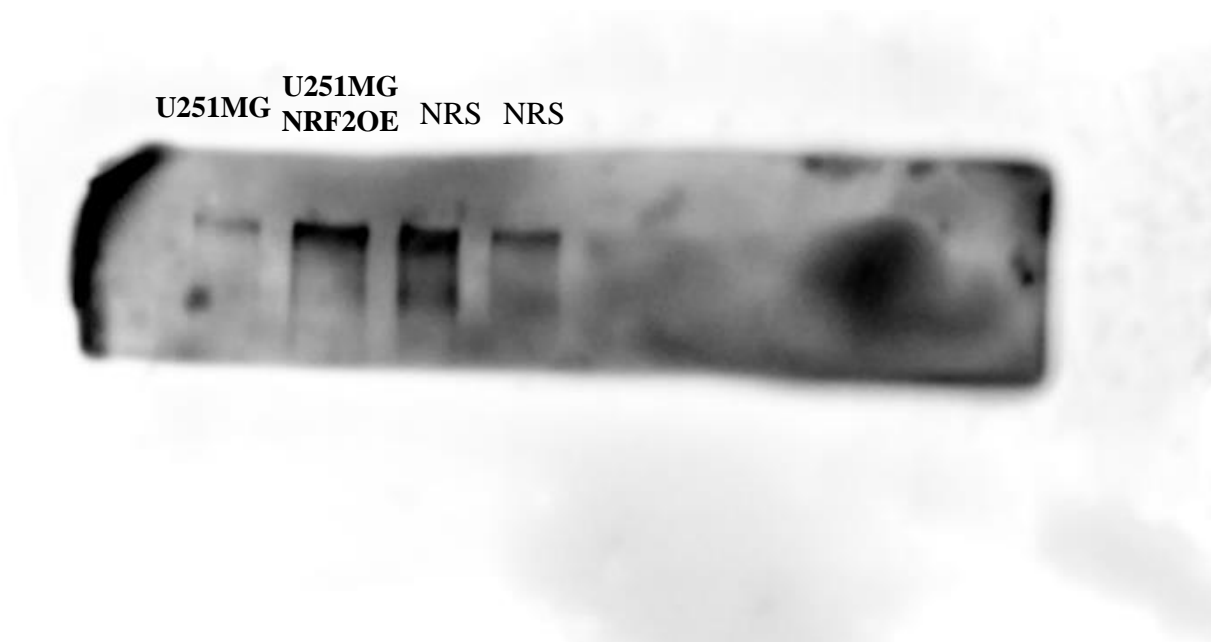

**b-actin of NRF2 and MRP1 membrane:**

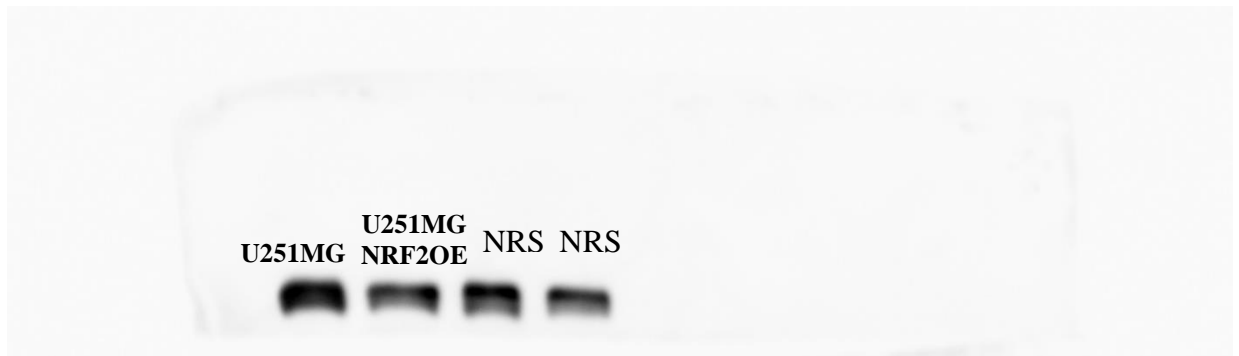

**Figure 5D:**

**NRF2:**

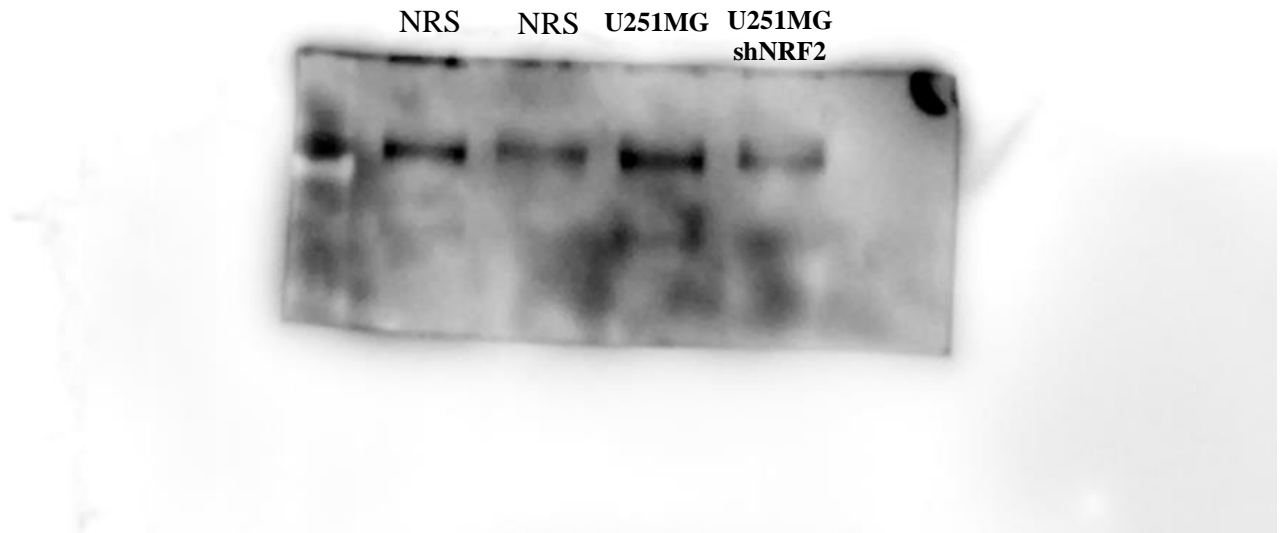

**Ponceau of NRF2 membrane:**

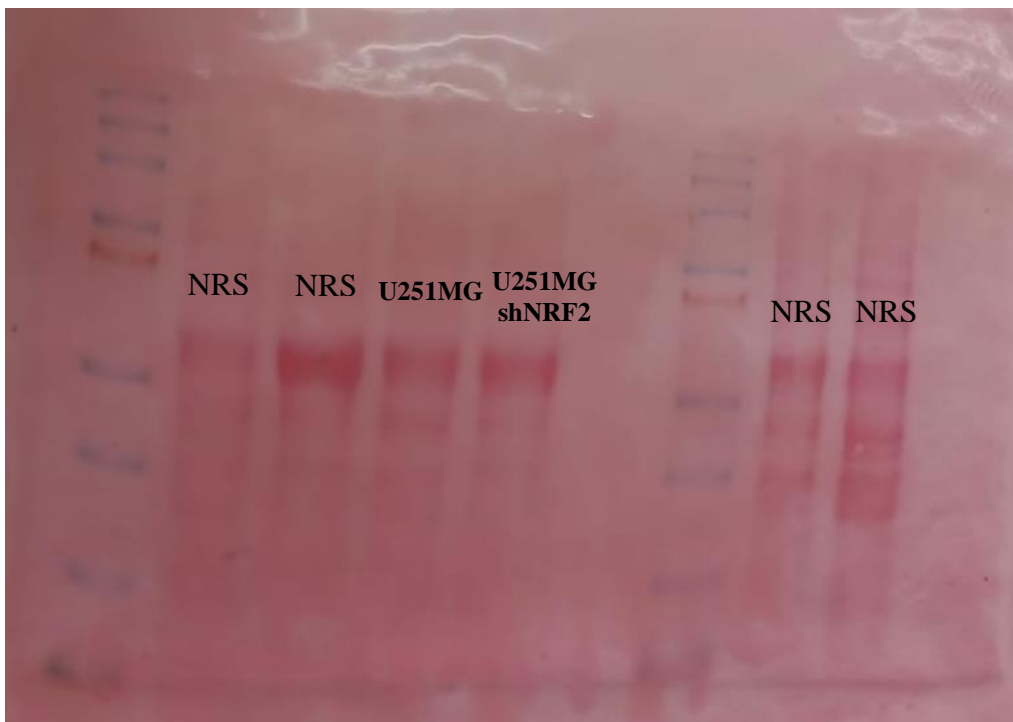



**MRP1:**

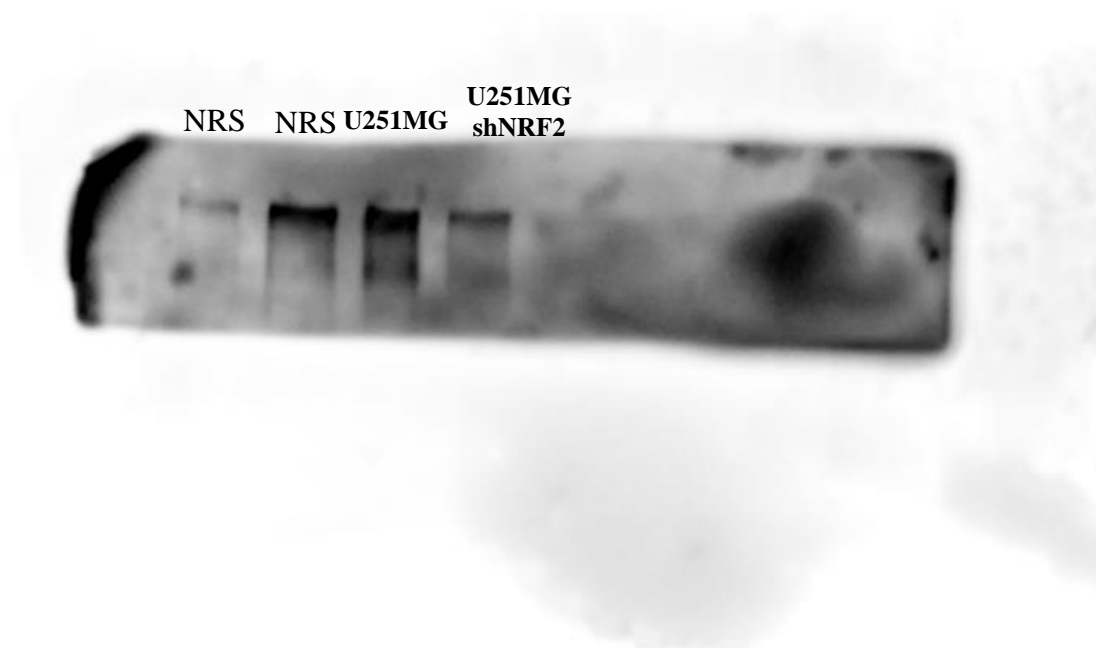

**b-actin of MRP1 membrane:**

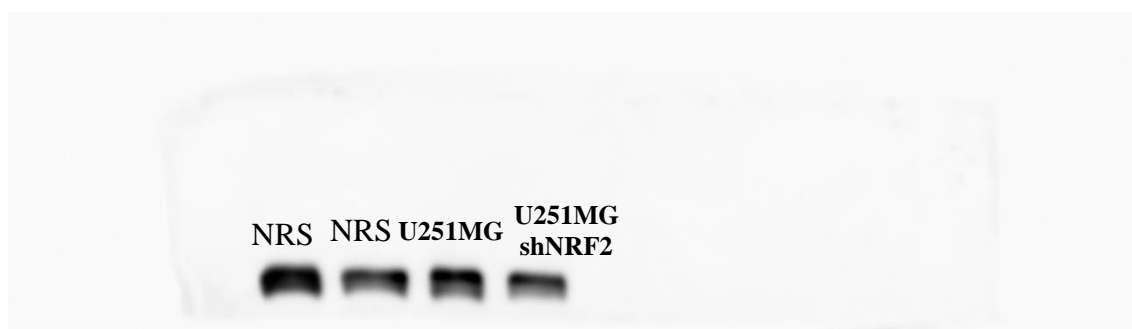

**Figure H:**

**MRP1:**

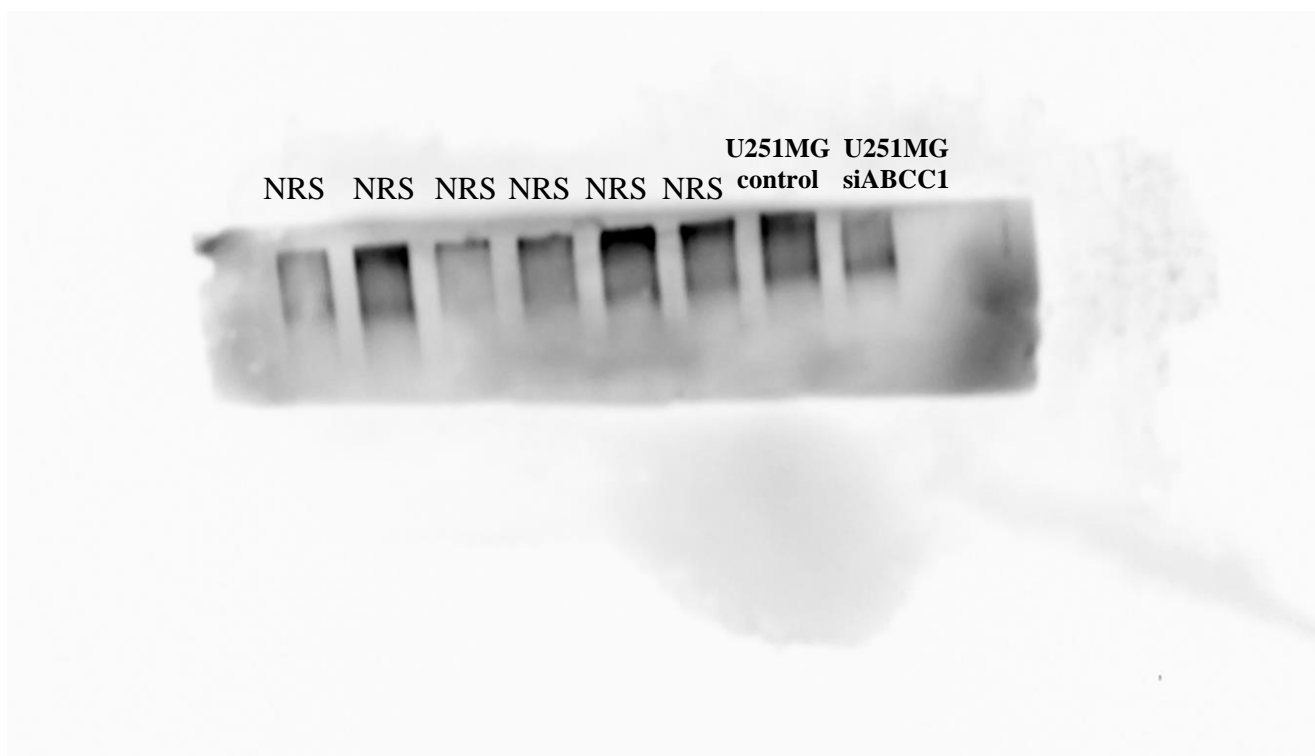

**b-actin:**

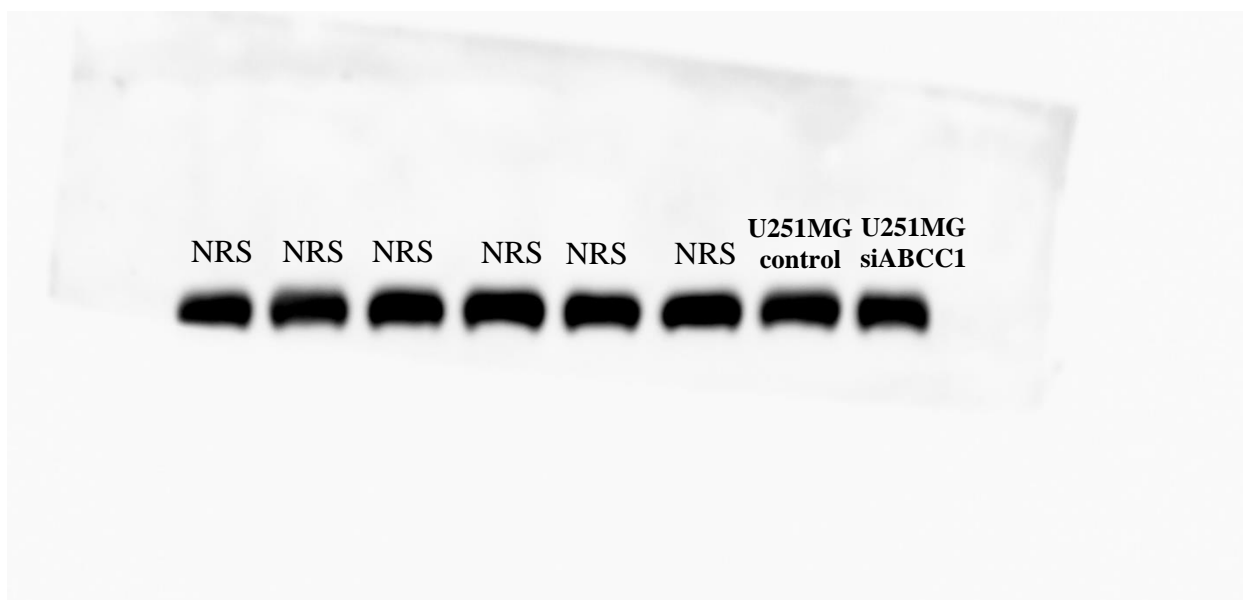

**Figure 5K:**

**Caspase-3 cleaved:**

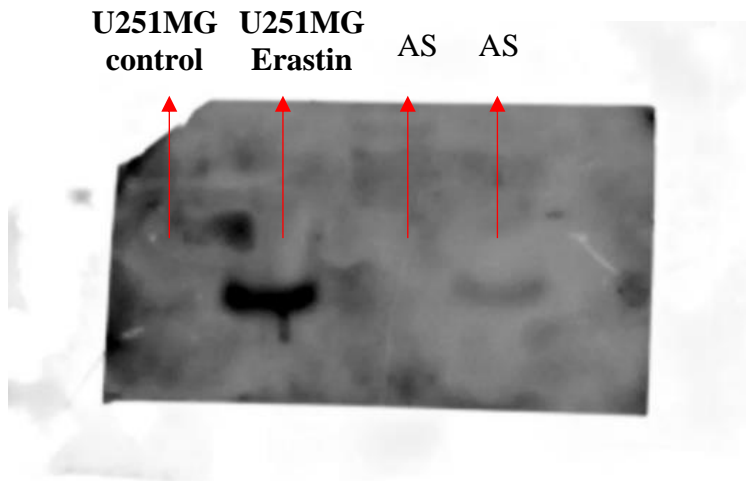

**b-actin:**

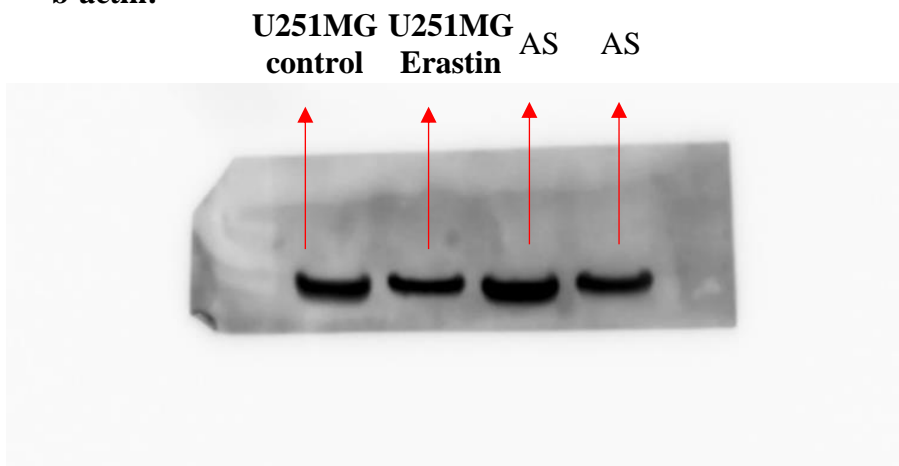

Supplement: 41419_2022_5044_MOESM3_ESM.pdf [file 41419_2022_5044_MOESM3_ESM.pdf]
